# Supplementary material
Source: MDPI journal article supplement (https://www.mdpi.com/2304-6732/9/7/501)
Supplement: s1 [file s1]

Archive with 2 entries (2 files):
- Hagen-visualization1.avi
- photonics-1726391-supplementary.pdf
